# Supplementary material
Source: publisher site journal article supplement (https://www.dovepress.com/article/437425)
Supplement: Supplementary file 1 [file get_supplementary_file.php]

**Supplementary table 1.** Baseline characteristics according to the presence or absence of AHF.

| Variable | Total | No | Yes | P value |
| --- | --- | --- | --- | --- |
| Age | 46.16±0.28 | 45.74±0.28 | 62.05±0.65 | < 0.0001 |
| PIR | 3.29±0.04 | 3.30±0.04 | 2.92±0.10 | < 0.0001 |
| MET | 2249.81±57.00 | 2238.95± 57.51 | 2660.33±224.10 | 0.06 |
| Energy (kcal) | 2164.64±12.97 | 2171.50±13.12 | 1905.63±38.08 | < 0.0001 |
| Protein (g/d) | 83.41±0.47 | 83.52±0.48 | 79.14±1.86 | 0.02 |
| Fiber (g/d) | 17.18±0.18 | 17.20±0.18 | 16.45±0.63 | 0.23 |
| Fat (g/d) | 83.54±0.58 | 83.72±0.59 | 76.74±2.01 | < 0.001 |
| Calcium (mg/d) | 935.57±8.14 | 938.21± 8.12 | 835.91±27.67 | < 0.001 |
| Phosphorus (mg/d) | 1376.05±8.78 | 1379.19± 8.67 | 1257.32±31.63 | < 0.0001 |
| Magnesium (mg/d) | 301.00±2.62 | 301.58±2.62 | 279.07±9.49 | 0.02 |
| Sodium (mg/d) | 3510.98±22.11 | 3515.07±21.86 | 3356.35±92.69 | 0.07 |
| Potassium (mg/d) | 2797.51±19.74 | 2801.58±19.94 | 2643.53±63.27 | 0.01 |
| PRALR (mEq/day) | 13.05±0.30 | 13.08±0.31 | 11.66±1.25 | 0.27 |
| NEAPF (mEq/day) | 56.03±0.33 | 55.99±0.34 | 57.68±2.44 | 0.5 |
| NEAPR (mEq/day) | 58.14±0.34 | 58.03±0.34 | 62.27±1.26 | 0.001 |
| NEAPL (mEq/day) | 55.50±0.27 | 55.55±0.27 | 53.53±1.14 | 0.08 |
| Sex (%) |  |  |  | 0.06 |
| Male | 9322(49.55) | 8888(48.74) | 434(53.30) |  |
| Female | 9493(50.45) | 9126(51.26) | 367(46.70) |  |
| Race (%) |  |  |  | 0.09 |
| Mexican American | 2798(14.87) | 2669(5.72) | 129(6.14) |  |
| Non-Hispanic White | 3824(20.32) | 3628(9.32) | 196(12.03) |  |
| Non-Hispanic Black | 9020(47.94) | 8630(74.43) | 390(74.39) |  |
| Other Hispanic | 1363(7.24) | 1308(4.89) | 55(3.69) |  |
| Other Race | 1810(9.62) | 1779(5.64) | 31(3.75) |  |
| Marital (%) |  |  |  | 0.16 |
| Non-single | 12178(64.72) | 11689(69.95) | 489(66.64) |  |
| Single | 6637(35.28) | 6325(30.05) | 312(33.36) |  |
| Education (%) |  |  |  | < 0.0001 |
| <high school | 1513(8.04) | 1407(3.65) | 106(7.04) |  |
| high school | 6239(33.16) | 5908(31.30) | 331(42.14) |  |
| >high school | 11063(58.8) | 10699(65.04) | 364(50.82) |  |
| Smoking (%) |  |  |  | < 0.0001 |
| Never | 11308(60.1) | 10883(59.61) | 425(51.77) |  |
| Former | 4646(24.69) | 4330(24.70) | 316(40.74) |  |
| Now | 2861(15.21) | 2801(15.69) | 60(7.49) |  |
| Diabetes (%) |  |  |  | < 0.0001 |
| No | 16083(85.48) | 15786(91.96) | 297(43.94) |  |
| Yes | 2732(14.52) | 2228(8.04) | 504(56.06) |  |
| Hypertension (%) |  |  |  | < 0.0001 |
| No | 11574(61.51) | 11373(68.48) | 201(29.52) |  |
| Yes | 7241(38.49) | 6641(31.52) | 600(70.48) |  |
| CVD (%) |  |  |  | < 0.0001 |
| No | 17208(91.46) | 16644(93.90) | 564(70.94) |  |
| Yes | 1607(8.54) | 1370(6.10) | 237(29.06) |  |

Abbreviations: AHF, advanced liver fibrosis; PIR, family income to poverty; MET, metabolic equivalent;PRAL, potential renal acid load; NEAP, estimated net endogenous acid production; CVD, cardiovascular disease.

**Supplementary table 2**. Multivariate regression analysis of DAL and AHF.

| Variable | Model 1  OR (95%CI) P-value | Model 2  OR (95%CI) P-value | Model 3  OR (95%CI) P-value |
| --- | --- | --- | --- |
| PRALR | 1.00 (0.99, 1.00) 0.2737 | 1.01 (1.00, 1.02) 0.0101 | 1.01 (1.00, 1.01) 0.2347 |
| PRALR quartile |  |  |  |
| Q1 | Ref. | Ref. | Ref. |
| Q2 | 1.05 (0.80, 1.39) 0.7228 | 1.22 (0.92, 1.63) 0.1649 | 1.13 (0.84, 1.53) 0.4234 |
| Q3 | 0.90 (0.67, 1.22) 0.5096 | 1.33 (0.96, 1.86) 0.0916 | 1.08 (0.74, 1.58) 0.6876 |
| Q4 | 0.79 (0.57, 1.11) 0.1818 | 1.55 (1.05, 2.29) 0.0282 | 1.33 (0.86, 2.07) 0.2004 |
| p for trend | 0.1144 | 0.0247 | 0.2743 |
| NEAPF | 1.00 (0.99, 1.01) 0.4759 | 1.02 (1.01, 1.02) 0.0013 | 1.01 (1.00, 1.02) 0.0319 |
| NEAPF quartile |  |  |  |
| Q1 | Ref. | Ref. | Ref. |
| Q2 | 0.99 (0.76, 1.29) 0.9404 | 1.21 (0.92, 1.59) 0.1747 | 1.10 (0.82, 1.47) 0.5443 |
| Q3 | 1.01 (0.74, 1.38) 0.9568 | 1.50 (1.07, 2.10) 0.0189 | 1.21 (0.84, 1.74) 0.2993 |
| Q4 | 0.96 (0.70, 1.31) 0.7916 | 1.84 (1.30, 2.60) 0.0008 | 1.51 (1.03, 2.21) 0.0350 |
| p for trend | 0.8367 | 0.0006 | 0.0425 |
| NEAPR | 1.01 (1.00, 1.01) 0.0009 | 1.02 (1.02, 1.03) <0.0001 | 1.02 (1.01, 1.03) <0.0001 |
| NEAPR quartile |  |  |  |
| Q1 | Ref. | Ref. | Ref. |
| Q2 | 1.24 (0.93, 1.66) 0.1472 | 1.59 (1.16, 2.18) 0.0047 | 1.36 (0.98, 1.90) 0.0698 |
| Q3 | 1.41 (1.01, 1.95) 0.0429 | 2.48 (1.70, 3.63) <0.0001 | 1.91 (1.28, 2.85) 0.0019 |
| Q4 | 1.65 (1.23, 2.21) 0.0010 | 4.23 (2.91, 6.15) <0.0001 | 3.31 (2.20, 4.99) <0.0001 |
| p for trend | 0.0014 | <0.0001 | <0.0001 |
| NEAPL | 0.99 (0.99, 1.00) 0.0933 | 1.01 (1.00, 1.01) 0.0176 | 1.01 (1.00, 1.02) 0.2424 |
| NEAPL quartile |  |  |  |
| Q1 | Ref. | Ref. | Ref. |
| Q2 | 1.06 (0.77, 1.46) 0.7038 | 1.28 (0.92, 1.79) 0.1494 | 1.19 (0.84, 1.70) 0.3244 |
| Q3 | 0.90 (0.65, 1.25) 0.5260 | 1.38 (0.95, 2.01) 0.0930 | 1.13 (0.75, 1.69) 0.5539 |
| Q4 | 0.75 (0.54, 1.04) 0.0841 | 1.54 (1.04, 2.27) 0.0331 | 1.38 (0.86, 2.23) 0.1877 |
| p for trend | 0.0581 | 0.0341 | 0.2579 |

Abbreviations: AHF, advanced liver fibrosis; OR, odds ratio; 95% CI, 95% confidence interval; PRAL, potential renal acid load; NEAP, estimated net endogenous acid production.

**Supplementary table 3.** Piecewise logistic regression analysis on both sides of the inflection point for DAL and NAFLD.

| Variable | OR (95%CI) P-value |
| --- | --- |
| PRALR < 11.8373 | 1.015 (1.011, 1.020) <0.0001 |
| PRALR ≥11.8373 | 1.009 (1.005, 1.014) 0.0001 |
| NEAPF <53.996 | 1.014 (1.007, 1.021) 0.0002 |
| NEAPF ≥53.996 | 1.005 (1.002, 1.009) 0.0059 |
| NEAPR < 56.4236 | 1.028 (1.022, 1.034) <0.0001 |
| NEAPR ≥56.4236 | 1.021 (1.016, 1.025) <0.0001 |
| NEAPL <53.161 | 1.018 (1.010, 1.025) <0.0001 |
| NEAPL ≥ 53.161 | 1.007 (1.003, 1.012) 0.0017 |

Abbreviations: NAFLD, nonalcoholic fatty liver disease; DAL, dietary acid load; OR, odds ratio; 95% CI, 95% confidence interval; PRAL, potential renal acid load; NEAP, estimated net endogenous acid production.

**Supplementary table 4.** Piecewise logistic regression analysis on both sides of the inflection point for DAL and AHF.

| Variable | OR (95%CI) P-value |
| --- | --- |
| NEAPF< 53.9965 | 1.013 (1.001, 1.026) 0.0339 |
| NEAPF ≥53.9965 | 1.017 (0.998, 1.035) 0.0760 |
| NEAPR< 56.4236 | 1.025 (1.008, 1.042) 0.0053 |
| NEAPR ≥56.4236 | 1.016 (1.003, 1.028) 0.0146 |

Abbreviations: AHF, advanced liver fibrosis; DAL, dietary acid load; OR, odds ratio; 95% CI, 95% confidence interval; NEAP, estimated net endogenous acid production.

**Supplementary table 5**. DAL as a tertile variable in relation to NAFLD.

|  | Model 1  OR (95%CI) P-value | Model 2  OR (95%CI) P-value | Model 3  OR (95%CI) P-value |
| --- | --- | --- | --- |
| PRALR | 1.01 (1.01, 1.01) <0.0001 | 1.01 (1.01, 1.01) <0.0001 | 1.01 (1.01, 1.01) <0.0001 |
| PRALR tertile |  |  |  |
| T1 | Ref. | Ref. | Ref. |
| T2 | 1.15 (1.06, 1.26) 0.0014 | 1.24 (1.13, 1.36) <0.0001 | 1.20 (1.10, 1.32) 0.0002 |
| T3 | 1.58 (1.41, 1.75) <0.0001 | 1.71 (1.52, 1.92) <0.0001 | 1.58 (1.39, 1.79) <0.0001 |
| p for trend | 1.26 (1.19, 1.33) <0.0001 | 1.31 (1.23, 1.38) <0.0001 | 1.25 (1.18, 1.34) <0.0001 |
| NEAPF | <0.0001 | <0.0001 | <0.0001 |
| NEAPF tertile |  |  |  |
| T1 | Ref. | Ref. | Ref. |
| T2 | 1.18 (1.06, 1.32) 0.0034 | 1.24 (1.11, 1.39) 0.0003 | 1.19 (1.05, 1.33) 0.0051 |
| T3 | 1.55 (1.38, 1.75) <0.0001 | 1.76 (1.57, 1.99) <0.0001 | 1.62 (1.44, 1.83) <0.0001 |
| p for trend | 1.25 (1.18, 1.32) <0.0001 | 1.33 (1.25, 1.41) <0.0001 | 1.27 (1.20, 1.35) <0.0001 |
| NEAPR | <0.0001 | <0.0001 | <0.0001 |
| NEAPR tertile |  |  |  |
| T1 | Ref. | Ref. | Ref. |
| T2 | 1.77 (1.57, 1.99) <0.0001 | 1.98 (1.75, 2.23) <0.0001 | 1.90 (1.69, 2.14) <0.0001 |
| T3 | 3.16 (2.81, 3.55) <0.0001 | 3.73 (3.28, 4.23) <0.0001 | 3.47 (3.00, 4.01) <0.0001 |
| p for trend | 1.78 (1.68, 1.88) <0.0001 | 1.93 (1.81, 2.06) <0.0001 | 1.86 (1.73, 2.00) <0.0001 |
| NEAPL | <0.0001 | <0.0001 | <0.0001 |
| NEAPL tertile |  |  |  |
| T1 | Ref. | Ref. | Ref. |
| T2 | 1.12 (1.01, 1.23) 0.0283 | 1.19 (1.08, 1.31) 0.0007 | 1.14 (1.03, 1.26) 0.0136 |
| T3 | 1.50 (1.35, 1.67) <0.0001 | 1.56 (1.39, 1.76) <0.0001 | 1.44 (1.27, 1.64) <0.0001 |
| p for trend | <0.0001 | <0.0001 | <0.0001 |

Abbreviations: NAFLD, nonalcoholic fatty liver disease; DAL, dietary acid load; OR, odds ratio; 95% CI, 95% confidence interval; PRAL, potential renal acid load; NEAP, estimated net endogenous acid production.

**Supplementary table 6**. DAL as a quintile variable in relation to NAFLD.

|  | Model 1  OR (95%CI) P-value | Model 2  OR (95%CI) P-value | Model 3  OR (95%CI) P-value |
| --- | --- | --- | --- |
| PRALR | 1.01 (1.01, 1.01) <0.0001 | 1.01 (1.01, 1.01) <0.0001 | 1.01 (1.01, 1.01) <0.0001 |
| PRALR quantiles |  |  |  |
| Q1 | Ref. | Ref. | Ref. |
| Q2 | 1.22 (1.08, 1.36) 0.0011 | 1.27 (1.12, 1.44) 0.0003 | 1.27 (1.11, 1.45) 0.0006 |
| Q3 | 1.29 (1.16, 1.44) <0.0001 | 1.42 (1.26, 1.60) <0.0001 | 1.38 (1.21, 1.56) <0.0001 |
| Q4 | 1.35 (1.18, 1.54) <0.0001 | 1.51 (1.32, 1.73) <0.0001 | 1.44 (1.25, 1.66) <0.0001 |
| Q5 | 1.92 (1.72, 2.15) <0.0001 | 2.10 (1.86, 2.37) <0.0001 | 1.93 (1.68, 2.21) <0.0001 |
| p for trend | <0.0001 | <0.0001 | <0.0001 |
| NEAPF | 1.01 (1.01, 1.01) <0.0001 | 1.01 (1.01, 1.01) <0.0001 | 1.01 (1.01, 1.01) <0.0001 |
| NEAPF quantiles |  |  |  |
| Q1 | Ref. | Ref. | Ref. |
| Q2 | 1.30 (1.13, 1.50) 0.0004 | 1.32 (1.13, 1.53) 0.0005 | 1.28 (1.09, 1.50) 0.0027 |
| Q3 | 1.33 (1.18, 1.50) <0.0001 | 1.41 (1.23, 1.60) <0.0001 | 1.35 (1.18, 1.54) <0.0001 |
| Q4 | 1.62 (1.44, 1.83) <0.0001 | 1.80 (1.58, 2.05) <0.0001 | 1.69 (1.46, 1.95) <0.0001 |
| Q5 | 1.74 (1.49, 2.04) <0.0001 | 2.03 (1.73, 2.37) <0.0001 | 1.83 (1.57, 2.15) <0.0001 |
| p for trend | <0.0001 | <0.0001 | <0.0001 |
| NEAPR | 1.02 (1.02, 1.03) <0.0001 | 1.03 (1.02, 1.03) <0.0001 | 1.03 (1.02, 1.03) <0.0001 |
| NEAPR quantiles |  |  |  |
| Q1 | Ref. | Ref. | Ref. |
| Q2 | 1.72 (1.48, 2.00) <0.0001 | 1.81 (1.55, 2.12) <0.0001 | 1.80 (1.53, 2.11) <0.0001 |
| Q3 | 2.17 (1.90, 2.48) <0.0001 | 2.50 (2.18, 2.86) <0.0001 | 2.37 (2.06, 2.73) <0.0001 |
| Q4 | 2.94 (2.56, 3.38) <0.0001 | 3.49 (3.01, 4.05) <0.0001 | 3.36 (2.87, 3.93) <0.0001 |
| Q5 | 4.48 (3.95, 5.08) <0.0001 | 5.61 (4.87, 6.46) <0.0001 | 5.31 (4.53, 6.23) <0.0001 |
| p for trend | <0.0001 | <0.0001 | <0.0001 |
| NEAPL | 1.01 (1.01, 1.01) <0.0001 | 1.01 (1.01, 1.01) <0.0001 | 1.01 (1.01, 1.01) <0.0001 |
| NEAPL quantiles |  |  |  |
| Q1 | Ref. | Ref. | Ref. |
| Q2 | 1.18 (1.00, 1.39) 0.0516 | 1.25 (1.05, 1.49) 0.0139 | 1.26 (1.06, 1.50) 0.0107 |
| Q3 | 1.25 (1.11, 1.42) 0.0005 | 1.36 (1.20, 1.54) <0.0001 | 1.30 (1.14, 1.49) 0.0002 |
| Q4 | 1.46 (1.27, 1.67) <0.0001 | 1.60 (1.40, 1.83) <0.0001 | 1.52 (1.31, 1.76) <0.0001 |
| Q5 | 1.79 (1.57, 2.04) <0.0001 | 1.92 (1.65, 2.24) <0.0001 | 1.79 (1.52, 2.10) <0.0001 |
| p for trend | <0.0001 | <0.0001 | <0.0001 |

Abbreviations: NAFLD, nonalcoholic fatty liver disease; DAL, dietary acid load; OR, odds ratio; 95% CI, 95% confidence interval; PRAL, potential renal acid load; NEAP, estimated net endogenous acid production.

**Supplementary table 7**. DAL as a tertile variable in relation to AHF.

|  | Model 1  OR (95%CI) P-value | Model 2  OR (95%CI) P-value | Model 3  OR (95%CI) P-value |
| --- | --- | --- | --- |
| PRALR | 1.00 (0.99, 1.00) 0.2737 | 1.01 (1.00, 1.02) 0.0101 | 1.01 (1.00, 1.01) 0.2347 |
| PRALR tertile |  |  |  |
| T1 | Ref. | Ref. | Ref. |
| T2 | 0.90 (0.70, 1.17) 0.4413 | 1.17 (0.89, 1.52) 0.2634 | 1.03 (0.77, 1.38) 0.8430 |
| T3 | 0.84 (0.64, 1.11) 0.2208 | 1.57 (1.13, 2.19) 0.0081 | 1.34 (0.93, 1.91) 0.1175 |
| p for trend | 0.2181 | 0.0097 | 0.1440 |
| NEAPF | 1.00 (0.99, 1.01) 0.4759 | 1.02 (1.01, 1.02) 0.0013 | 1.01 (1.00, 1.02) 0.0319 |
| NEAPF tertile |  |  |  |
| T1 | Ref. | Ref. | Ref. |
| T2 | 0.88 (0.68, 1.15) 0.3648 | 1.15 (0.87, 1.53) 0.3238 | 1.02 (0.76, 1.38) 0.8810 |
| T3 | 0.95 (0.72, 1.24) 0.6904 | 1.66 (1.22, 2.27) 0.0016 | 1.36 (0.95, 1.94) 0.0935 |
| p for trend | 0.6761 | 0.0024 | 0.1099 |
| NEAPR | 1.01 (1.00, 1.01) 0.0009 | 1.02 (1.02, 1.03) <0.0001 | 1.02 (1.01, 1.03) <0.0001 |
| NEAPR tertile |  |  |  |
| T1 | Ref. | Ref. | Ref. |
| T2 | 1.44 (1.11, 1.87) 0.0071 | 2.07 (1.55, 2.78) <0.0001 | 1.67 (1.21, 2.31) 0.0024 |
| T3 | 1.54 (1.17, 2.03) 0.0026 | 3.43 (2.43, 4.85) <0.0001 | 2.67 (1.84, 3.88) <0.0001 |
| p for trend | 0.0026 | <0.0001 | <0.0001 |
| NEAPL | 0.99 (0.99, 1.00) 0.0933 | 1.01 (1.00, 1.01) 0.0176 | 1.01 (1.00, 1.02) 0.2424 |
| NEAPL tertile |  |  |  |
| T1 | Ref. | Ref. | Ref. |
| T2 | 0.89 (0.70, 1.13) 0.3374 | 1.16 (0.89, 1.53) 0.2704 | 0.98 (0.73, 1.32) 0.9129 |
| T3 | 0.77 (0.58, 1.02) 0.0716 | 1.42 (1.00, 2.03) 0.0538 | 1.25 (0.84, 1.85) 0.2730 |
| p for trend | 0.0700 | 0.0559 | 0.3295 |

Abbreviations: AHF, advanced liver fibrosis; DAL, dietary acid load; OR, odds ratio; 95% CI, 95% confidence interval; PRAL, potential renal acid load; NEAP, estimated net endogenous acid production.

**Supplementary table 8**. DAL as a quintile variable in relation to AHF.

|  | Model 1  OR (95%CI) P-value | Model 2  OR (95%CI) P-value | Model 3  OR (95%CI) P-value |
| --- | --- | --- | --- |
| PRALR | 1.00 (0.99, 1.00) 0.2737 | 1.01 (1.00, 1.02) 0.0101 | 1.01 (1.00, 1.01) 0.2347 |
| PRALR quantiles |  |  |  |
| Q1 | Ref. | Ref. | Ref. |
| Q2 | 1.05 (0.76, 1.43) 0.7844 | 1.13 (0.81, 1.58) 0.4622 | 1.11 (0.77, 1.60) 0.5793 |
| Q3 | 0.92 (0.64, 1.31) 0.6431 | 1.20 (0.82, 1.74) 0.3484 | 1.02 (0.69, 1.52) 0.9146 |
| Q4 | 0.90 (0.63, 1.30) 0.5818 | 1.46 (0.98, 2.18) 0.0676 | 1.17 (0.75, 1.84) 0.4891 |
| Q5 | 0.76 (0.52, 1.12) 0.1673 | 1.57 (1.01, 2.42) 0.0453 | 1.36 (0.83, 2.25) 0.2284 |
| p for trend | 0.1177 | 0.0274 | 0.2946 |
| NEAPF | 1.00 (0.99, 1.01) 0.4759 | 1.02 (1.01, 1.02) 0.0013 | 1.01 (1.00, 1.02) 0.0319 |
| NEAPF quantiles |  |  |  |
| Q1 | Ref. | Ref. | Ref. |
| Q2 | 1.27 (0.96, 1.69) 0.1008 | 1.45 (1.07, 1.97) 0.0195 | 1.38 (1.00, 1.89) 0.0506 |
| Q3 | 0.93 (0.67, 1.28) 0.6548 | 1.29 (0.93, 1.80) 0.1322 | 1.09 (0.76, 1.56) 0.6257 |
| Q4 | 1.00 (0.70, 1.41) 0.9786 | 1.59 (1.07, 2.35) 0.0219 | 1.31 (0.86, 1.99) 0.2131 |
| Q5 | 1.12 (0.77, 1.62) 0.5524 | 2.26 (1.48, 3.46) 0.0003 | 1.85 (1.16, 2.97) 0.0116 |
| p for trend | 0.9618 | 0.0008 | 0.0438 |
| NEAPR | 1.01 (1.00, 1.01) 0.0009 | 1.02 (1.02, 1.03) <0.0001 | 1.02 (1.01, 1.03) <0.0001 |
| NEAPR quantiles |  |  |  |
| Q1 | Ref. | Ref. | Ref. |
| Q2 | 1.40 (0.96, 2.03) 0.0813 | 1.61 (1.09, 2.37) 0.0184 | 1.42 (0.96, 2.09) 0.0785 |
| Q3 | 1.52 (1.03, 2.24) 0.0359 | 2.30 (1.52, 3.50) 0.0001 | 1.68 (1.11, 2.52) 0.0148 |
| Q4 | 1.57 (1.08, 2.27) 0.0191 | 2.96 (1.94, 4.54) <0.0001 | 2.28 (1.47, 3.54) 0.0003 |
| Q5 | 1.84 (1.32, 2.58) 0.0005 | 5.14 (3.38, 7.82) <0.0001 | 3.99 (2.57, 6.21) <0.0001 |
| p for trend | 0.0012 | <0.0001 | <0.0001 |
| NEAPL | 0.99 (0.99, 1.00) 0.0933 | 1.01 (1.00, 1.01) 0.0176 | 1.01 (1.00, 1.02) 0.2424 |
| NEAPL quantiles |  |  |  |
| Q1 | Ref. | Ref. | Ref. |
| Q2 | 1.06 (0.77, 1.45) 0.7295 | 1.22 (0.86, 1.75) 0.2655 | 1.25 (0.86, 1.83) 0.2426 |
| Q3 | 0.93 (0.69, 1.27) 0.6698 | 1.26 (0.90, 1.76) 0.1728 | 1.02 (0.70, 1.49) 0.9178 |
| Q4 | 0.89 (0.63, 1.24) 0.4860 | 1.49 (1.02, 2.20) 0.0429 | 1.26 (0.84, 1.90) 0.2645 |
| Q5 | 0.73 (0.51, 1.05) 0.0926 | 1.61 (1.04, 2.50) 0.0348 | 1.47 (0.85, 2.52) 0.1685 |
| p for trend | 0.0612 | 0.0280 | 0.2547 |

Abbreviations: AHF, advanced liver fibrosis; DAL, dietary acid load; OR, odds ratio; 95% CI, 95% confidence interval; PRAL, potential renal acid load; NEAP, estimated net endogenous acid production.

**Supplementary table 9**. Association of DAL with NAFLD diagnosed by USFLI.

| Variable | Model 1  OR (95%CI) P-value | Model 2  OR (95%CI) P-value | Model 3  OR (95%CI) P-value |
| --- | --- | --- | --- |
| PRALR | 1.01 (1.01, 1.02) <0.0001 | 1.02 (1.01, 1.02) <0.0001 | 1.02 (1.01, 1.02) <0.0001 |
| PRALR quartile |  |  |  |
| Q1 | Ref. | Ref. | Ref. |
| Q2 | 1.40 (1.16, 1.67) 0.0005 | 1.51 (1.24, 1.83) 0.0001 | 1.51 (1.21, 1.89) 0.0004 |
| Q3 | 1.27 (1.04, 1.54) 0.0201 | 1.56 (1.26, 1.94) 0.0001 | 1.38 (1.09, 1.75) 0.0074 |
| Q4 | 2.07 (1.70, 2.51) <0.0001 | 2.70 (2.22, 3.29) <0.0001 | 2.34 (1.89, 2.91) <0.0001 |
| p for trend | <0.0001 | <0.0001 | <0.0001 |
| NEAPF | 1.01 (1.01, 1.01) <0.0001 | 1.02 (1.01, 1.02) <0.0001 | 1.01 (1.01, 1.02) <0.0001 |
| NEAPF quartile |  |  |  |
| Q1 | Ref. | Ref. | Ref. |
| Q2 | 1.34 (1.09, 1.64) 0.0065 | 1.44 (1.16, 1.78) 0.0013 | 1.34 (1.06, 1.70) 0.0171 |
| Q3 | 1.60 (1.31, 1.97) <0.0001 | 1.92 (1.53, 2.40) <0.0001 | 1.69 (1.31, 2.19) 0.0001 |
| Q4 | 1.83 (1.46, 2.29) <0.0001 | 2.64 (2.09, 3.33) <0.0001 | 2.31 (1.82, 2.93) <0.0001 |
| p for trend | <0.0001 | <0.0001 | <0.0001 |
| NEAPR | 1.02 (1.02, 1.03) <0.0001 | 1.03 (1.03, 1.03) <0.0001 | 1.03 (1.03, 1.03) <0.0001 |
| NEAPR quartile |  |  |  |
| Q1 | Ref. | Ref. | Ref. |
| Q2 | 1.80 (1.35, 2.38) 0.0001 | 2.12 (1.60, 2.81) <0.0001 | 2.12 (1.55, 2.89) <0.0001 |
| Q3 | 2.13 (1.67, 2.73) <0.0001 | 2.90 (2.24, 3.75) <0.0001 | 2.64 (2.01, 3.46) <0.0001 |
| Q4 | 3.95 (3.12, 4.99) <0.0001 | 6.27 (4.98, 7.90) <0.0001 | 5.48 (4.23, 7.09) <0.0001 |
| p for trend | <0.0001 | <0.0001 | <0.0001 |
| NEAPL | 1.01 (1.01, 1.02) <0.0001 | 1.02 (1.01, 1.02) <0.0001 | 1.02 (1.01, 1.02) <0.0001 |
| NEAPL quartile |  |  |  |
| Q1 | Ref. | Ref. | Ref. |
| Q2 | 1.31 (1.08, 1.60) 0.0069 | 1.45 (1.19, 1.76) 0.0003 | 1.39 (1.12, 1.74) 0.0035 |
| Q3 | 1.28 (1.04, 1.57) 0.0200 | 1.53 (1.23, 1.90) 0.0002 | 1.36 (1.06, 1.75) 0.0181 |
| Q4 | 1.96 (1.59, 2.41) <0.0001 | 2.48 (2.02, 3.06) <0.0001 | 2.15 (1.68, 2.77) <0.0001 |
| p for trend | <0.0001 | <0.0001 | <0.0001 |

Abbreviations: NAFLD, nonalcoholic fatty liver disease; DAL, dietary acid load; USFLI, US fatty liver index; OR, odds ratio; 95% CI, 95% confidence interval; PRAL, potential renal acid load; NEAP, estimated net endogenous acid production.
